# Supplementary material
Source: PubMed Central journal article supplement (PMC3085435)
Supplement: supp_jcs.084723_JCS084723TableS2.pdf [file supp_jcs.084723_JCS084723TableS2.pdf]

### **RT-PCR primers**

|                    |                          |
|--------------------|--------------------------|
| p63Alpha/Beta: For | CAGCACCAGCACTTACTTCAGA   |
| p63 alpha Rev: Rev | CCACCTCGGTAAGAACTGA      |
| p63 Beta: Rev      | TCAGACTTGCCAGATCCTGA     |
| p63 Gamma: For     | ACAGGAAGGCGGATGAAGATAGCA |
| p63 Gamma: Rev     | GGCTCCACAAGCTCATTCT      |
| p130: For          | CAGGCCCGGAGCCAGGTGTA     |
| p130: Rev          | GGAGCACTGCTGGGCTGTGG     |
| Rb: For            | CTCCACAGCTCGCTGGCTCC     |
| Rb: Rev            | CTCAAGCCTGACGAGAGGCAGGT  |
| p107: For          | CCCCGCACAAGAATGGGTCAGG   |
| p107: Rev          | ACAGACGCGTTTGGCAGGGG     |
| Skp2: For          | TGCGGACGCTATGCACAGGAAG   |
| Skp2: Rev          | GCGTGGCCAGGTTTGA         |
| RPLPO: For         | ATCAACGGGTACAAACGAGTC    |
| RPLPO: Rev         | CAGATGGATCAGCCAAGAAGG    |

### **ChIP primers**

|                    |                         |
|--------------------|-------------------------|
| Skp2 -234: FOR-    | ATCCGTTCTACAGTCCAGC     |
| Skp2 -234: REV     | TACCCGCCTTCGAGATAC      |
| Skp2 -1254: FOR    | TTCCTCAAGAGGCAGTTA      |
| Skp2 -1254: REV    | CGCATATTAGAATATTCAGTG   |
| Skp2 intron-1: For | GGAAGCCTGGGCCTCCAGTG 3' |
| Skp2 intron-1: Rev | GGAAGCCTGGGCCTCCAGTG 3' |
