# Supplementary material
Source: PubMed Central journal article supplement (PMC3085435)
Supplement: supp_jcs.084723_JCS084723TableS3.pdf [file supp_jcs.084723_JCS084723TableS3.pdf]

## Antibodies

| Antibody/Clone             | Supplier            | Species      | Application  |
|----------------------------|---------------------|--------------|--------------|
| Actin                      | Sigma               | Mouse        | WB           |
| BrDU(IIB5)                 | Santa Cruz          | Mouse        | IF           |
| Filaggrin(FLG0<br>HA(3F10) | Neomarkers<br>Roche | Mouse<br>Rat | I<br>F<br>WB |
| Keratin 1(AF87)            | Covance             | Rabbit       | IF           |
| Keratin 10                 | Biodesign           | Mouse        | IF           |
| Loricrin(AF62)             | Covance             | Rabbit       | IF           |
| p107 (C18)                 | Santa Cruz          | Rabbit       | WB           |
| p130(10/Rb2)               | BD Bioscience       | Mouse        | WB           |
| p21(12D1)                  | Cell signalling     | Rabbit       | IF           |
| p21(6B6)                   | BD Bioscience       | Mouse        | WB           |
| p27 (C-19)                 | Santa Cruz          | Rabbit       | WB           |
| p53(DO-1)                  | Santa Cruz          | Mouse        | WB           |
| p63(4A4)                   | Santa Cruz          | Mouse        | WB/ChIP      |
| Rb(G3-245)                 | BD Bioscience       | Mouse        | WB           |
| TG1 (N20)                  | Santa Cruz          | Goat         | IF           |

Abbreviations: WB, Western Blot; IF, immunofluorescence; ChIP, Chromatin immunoprecipitation
